# Supplementary material for: A fabricated hydrogel of hyaluronic acid/curcumin shows super-activity to heal the bacterial infected wound
Source: Springer Nature journal article supplement (doi:10.1186/s13568-023-01533-y), 2023-03-10
Supplement: MOESM1 [file 13568_2023_1533_MOESM1_ESM.pdf]

## **A fabricated hydrogel of hyaluronic acid / curcumin shows super-activity to heal the bacterial infected wound**

Maryam Khaleghi (Bioprocess Engineering Department, Institute of Industrial and Environmental Biotechnology, National Institute of Genetic Engineering and Biotechnology, Tehran, Iran. E.Mail: m\_khaleghi@nigeb.ac.ir)

Fakhri Haghi\* (Department of Microbiology, School of Medicine, Zanjan University of Medical Sciences, Zanjan, Iran. E.Mail: haghi@zums.ac.ir)

Mina Gholami (Department of Microbiology, School of Medicine, Zanjan University of Medical Sciences, Zanjan, Iran. E.Mail: M.Gholami137052@yahoo.com)

Hamdam Hoorfar (Bioprocess Engineering Department, Institute of Industrial and Environmental Biotechnology, National Institute of Genetic Engineering and Biotechnology, Tehran, Iran. E.Mail: Hhourfar@gmail.com)

Farshad Shahi (Bioprocess Engineering Department, Institute of Industrial and Environmental Biotechnology, National Institute of Genetic Engineering and Biotechnology, Tehran, Iran. E.Mail: F.shahi92@gmail.com)

Ali Mir Mousavi Zekoloujeh (Department of Biology, University of Zanjan, Zanjan, Iran. E.Mail: alimm689@gmail.com)

Farhang Aliakbari (Bioprocess Engineering Department, Institute of Industrial and Environmental Biotechnology, National Institute of Genetic Engineering and Biotechnology, Tehran, Iran. E.Mail: aliakbari@nigeb.ac.ir) and (Molecular Medicine Research Group, Robarts Research Institute, Schulich School of Medicine and Dentistry, University of Western Ontario, London, Ontario, Canada. E.Mail: [faliakb2@uwo.ca](mailto:faliakb2@uwo.ca))

Ebrahim Ahmadi (Department of Chemistry, University of Zanjan, Zanjan, Iran. E.Mail: Ahmadi@znu.ac.ir)

Dina Morshedi\* (Bioprocess Engineering Department, Institute of Industrial and Environmental Biotechnology, National Institute of Genetic Engineering and Biotechnology, Tehran, Iran. E.Mail: morshedi@nigeb.ac.ir)

**Corresponding authors:**

Morshedi@nigeb.ac.ir (Morshedi. D.), National Institute of Genetic Engineering and Biotechnology, Address: Shahrak-e Pajooresh, km 15 Tehran - Karaj Highway, Tehran, Iran, P.O.Box:14965/161. Phone: +9821-44878423, Fax: +9821-44878395

Haghi@zums.ac.ir (Haghi. F.), Department of Microbiology, School of Medicine, Zanjan University of Medical Sciences, Zanjan, I. R. 45139-56111, Iran

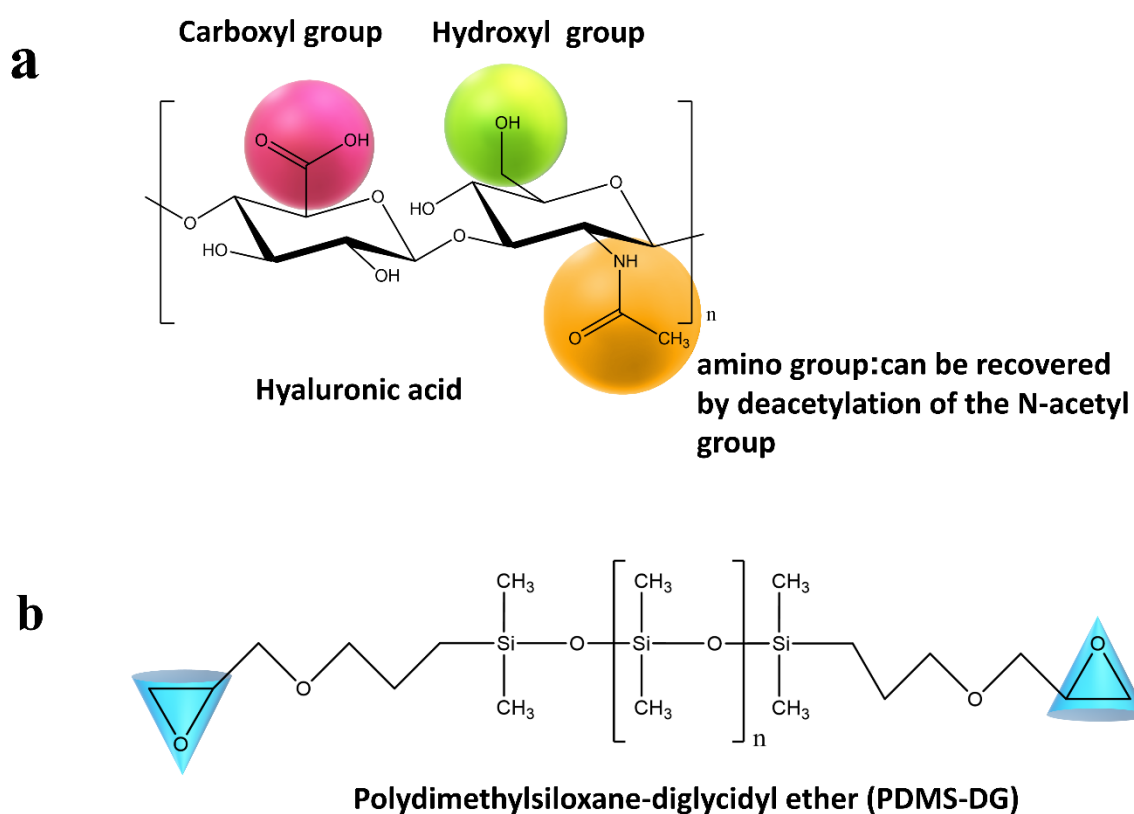

**Figure S1.** Chemical structure of HA (a) and PDMS-DG (b). HA consists of repeating disaccharide units: N-acetyl glucosamine and D-glucuronic acid. Two functional groups, hydroxyl and carboxyl, are shown by green and pink spheres. Also, an amino group can be recovered by deacetylation of the N-acetyl group (orange sphere). Polydimethylsiloxane is a kind of silicon that has two methyl groups attached to its silicon structure. PDMS-DG has two epoxy groups in its ends (blue cones). The chemical structures present here have been drawn by ChemBioDraw Ultra 12.0.

**Table S1.** The primers that were used to determine the effect of Gel-H.P and Gel-H.P.Cur on the expression of QS circuit genes (lasI, lasR, rhII and rhIR) employing real-time qPCR.

| Gene | Primer sequence                                         | Amplicon size (bp) |
|------|---------------------------------------------------------|--------------------|
| oprL | 5'-AACAGCGGTGCCGTTGAC-3'<br>5'-GTCGGAGCTGTCGTACTCGAA-3' | 87                 |
| lasI | 5'-CGCACATCTGGGAACTCA-3'<br>5'-CGGCACGGATCATCATCT-3'    | 176                |
| lasR | 5'-CTGTGGATGCTCAAGGACTAC-3'<br>5'-AACTGGTCTTGCCGATGG-3' | 133                |
| rhII | 5'-GTAGCGGGTTTGCGGATG-3'<br>5'-CGGCATCAGGTCTTCATCG-3'   | 101                |
| rhIR | 5'-GCCAGCGTCTTGTTTCGG-3'<br>5'-CGGTCTGCCTGAGCCATC-3'    | 160                |

**Table S2.** NMR characteristic peaks of HA, PDMS-DG and Gel-H.P

| Material | Signal name | Shift (ppm) | Description                             |
|----------|-------------|-------------|-----------------------------------------|
| HA       | 1           | 1.9         | CH <sub>3</sub> of N-acetyl glucosamine |
|          | 2           | 3.502       | Protons around the sugar ring           |
|          | 3           | 3.725       | Protons around the sugar ring           |
|          | 4           | 4.673       | Solvent: D <sub>2</sub> O               |
| PDMS-DG  | a           | -0.1-0.1    | Si-CH <sub>3</sub>                      |
|          | b           | 0.501       | -CH <sub>2</sub>                        |
|          | c           | 1.612       | -CH <sub>2</sub>                        |
|          | d           | 2.5         | Epoxy group protons                     |
|          | e           | 2.7         | Epoxy group protons                     |
|          | f           | 3.1         | Epoxy group protons                     |
|          | g           | 3.446       | -CH <sub>2</sub>                        |
|          | h           | 3.624       | -CH <sub>2</sub>                        |
| Gel-H.P  | a           | -0.1-0.1    | Si-CH <sub>3</sub>                      |
|          | b           | 0.501       | -CH <sub>2</sub>                        |
|          | c           | 1.612       | -CH <sub>2</sub>                        |
|          | 1           | 1.9         | CH <sub>3</sub> of N-acetyl glucosamine |
|          | 4           | 4.673       | Solvent: D <sub>2</sub> O               |
